# Supplementary material for: Crohn’s Disease Susceptibility and Onset Are Strongly Related to Three NOD2 Gene Haplotypes
Source: MDPI journal article supplement (doi:10.3390/jcm10173777), 2021-08-24
Supplement: s1 [file s1]

**Table S1.** Primers used for genotyping the *NOD2* gene with high resolution melting analysis (HRMA) and Sanger sequencing and pyrosequencing (PyroSeq). Primers marked with \* were biotinylated. F – forward primer, R – reverse primer, S – sequencing primer, T<sub>m</sub> – primers annealing temperature.

| SNP                                    | Method  | Primer Sequence<br>(5'-3')                                                       | PCR<br>product<br>(bp) | T <sub>m</sub><br>(°C) |
|----------------------------------------|---------|----------------------------------------------------------------------------------|------------------------|------------------------|
| rs2066842<br>c.802C>T<br>p.P268S       | HRMA    | F: GGAGGTCTGGGCAGATGTG<br>R: ACAGTGTCCGCATCGTCA                                  | 114                    | 56                     |
|                                        | PyroSeq | F: GGAGGTCTGGGCAGATGTG*<br>R: ACAGTGTCCGCATCGTCA<br>S: GGGCTCTCTGCGG             | 144                    | 60                     |
| rs2066844<br>c.2104C>T<br>p.R702W      | HRMA    | F: GAGCCGCACAACCTTCAGAT<br>R: GCGGGATGGAGTGGAAGT                                 | 172                    | 64                     |
|                                        | PyroSeq | F: GAGCCGCACAACCTTCAGAT*<br>R: GCGGGATGGAGTGGAAGT<br>S: GGCACAGGCCTGGCG          | 172                    | 60                     |
| rs2066845<br>c.2722G>C<br>p.G908R      | HRMA    | F: GACTCTTTGGCCTTTTCAGATT<br>R: CCAATGGTCTTTTTTCCTTACTCC                         | 242                    | 58                     |
|                                        | PyroSeq | F: GACTCTTTGGCCTTTTCAGATT*<br>R: CCAATGGTCTTTTTTCCTTACTCC<br>S: TCGTCACCCACTCTGT | 242                    | 60                     |
| rs5743289<br>c.2798+158C>T<br>IVS8+158 | HRMA    | F: TGCAGTTTTCTTGGGGAGA<br>R: TGTACCTGATCCAGCCAA                                  | 231                    | 58                     |
| rs5743293<br>c.3020insC<br>p.1007fs    | HRMA    | F: GGGACAGGTGGGCTTCAGTA<br>R: CCATTCCTCTCTCCCGTCAC                               | 279                    | 55                     |
|                                        | PyroSeq | F: ACCTACCTAGGGGCAGAAGC<br>R: CAGACTTCCAGGATGGTGTCA*<br>S: CCCTCCTGCAGGCCC       | 65                     | 60                     |

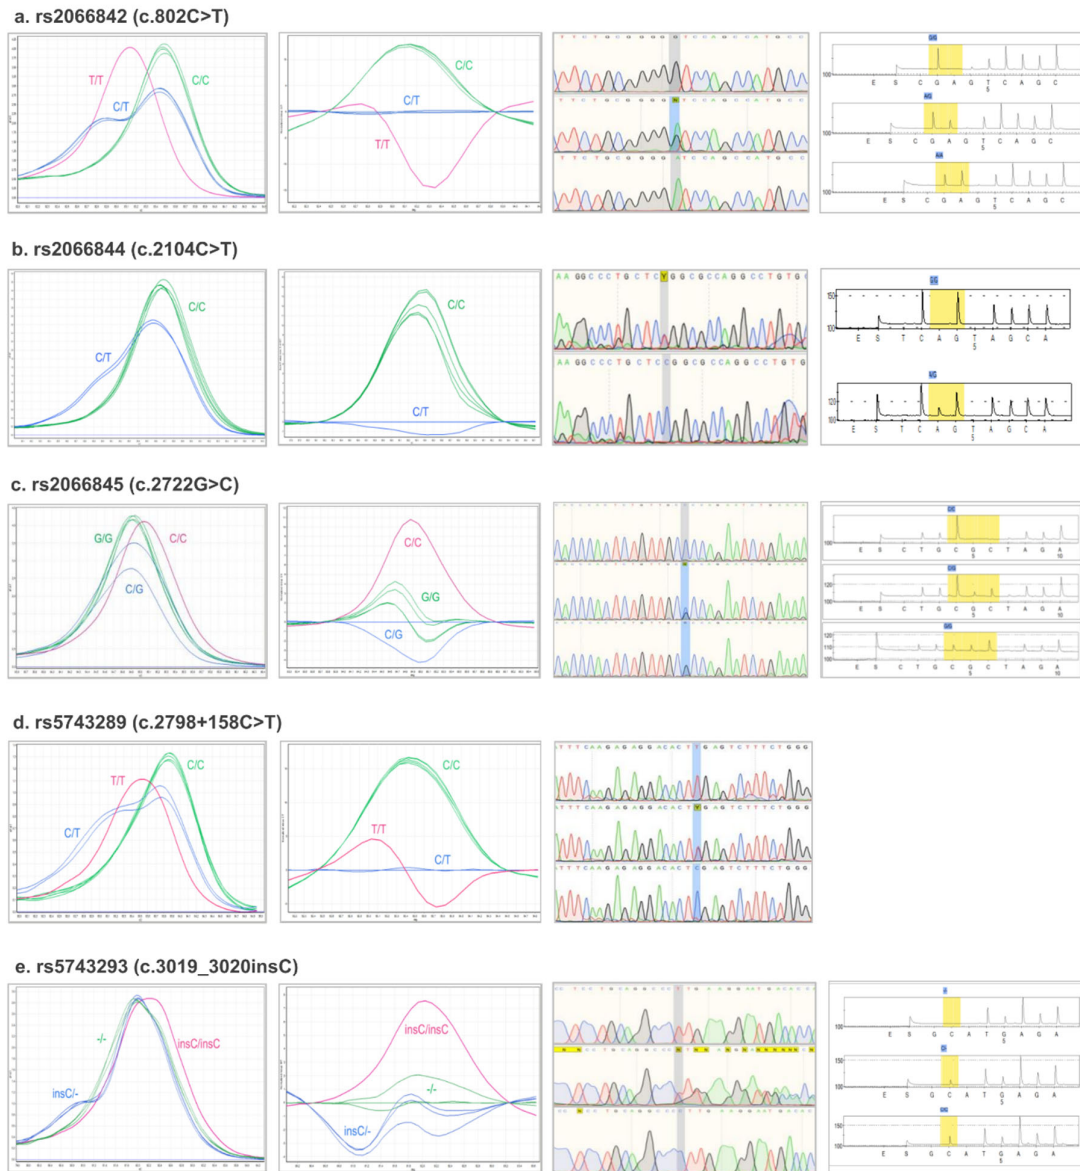

**Supplementary Figure S1.** Genotyping results for *NOD2* gene variants: a.) c.802C>T (p.P268S, rs2066842), b.) c.2104C>T (p.R702W, rs2066844), c.) c.2722G>C (p.G908R, rs2066845), d.) c.2798+158C>T, rs5743289, e.) c.3020insC (p.1007fs rs5743293) obtained using HRMA (melting curves and differential graphs), pyrosequencing and Sanger sequencing. Rs5743289 *locus* was genotyped only with HRMA and Sanger sequencing. In the case of a.) c.802C>T variant, sequencing primers (Sanger and pyrosequencing) were reverse; in case of b.) c.2104C>T variant Sanger sequencing primer was forward and pyrosequencing primer was reverse, c.), d.) and e.) – sequencing primers were forward.
